# Supplementary material
Source: PubMed Central journal article supplement (PMC6477897)

SUPPLEMENTARY DATA

**Supplementary Table S1. Primer sequences**

| Purpose                                       | Direction | Sequence                                       |
|-----------------------------------------------|-----------|------------------------------------------------|
| Amplification and resequencing of p.Lys355Gln | Forward   | GGCTCCATTTTATTGATTCCA                          |
|                                               | Reverse   | ATGCTTCCTCCCATTTC                              |
| Cloning of human <i>SLC19A2</i>               | Forward   | CCGCTCGAGGCCACCATGGATGTGCCCGGCC                |
|                                               | Reverse   | GCGACCGGTGGTGAAGTGGTACTTGAGAACTTGATTGTGGATCTCC |
| Site directed mutagenesis                     | Forward   | GCAGTTGGTTATATACAAATATCCTGG                    |
|                                               | Reverse   | CCAGGATATTTGTATATAACCAACTGC                    |
| qPCR (human <i>SLC19A2</i> )                  | Forward   | GGCCGGACAAGAACCTGAC                            |
|                                               | Reverse   | ACACAGGAAACAGTAGCACCA                          |
| qPCR (mouse <i>SLC19A2</i> )                  | Forward   | GGATGGGAGGACATTGAGTC                           |
|                                               | Reverse   | TCCACAGGACTCTGAACACC                           |
| qPCR (mouse <i>SLC19A3</i> )                  | Forward   | TGGTCAAGTCGAGCTATTCG                           |
|                                               | Reverse   | GTGTCTATGCCGAACACCAG                           |
| qPCR (mouse <i>TBP</i> )                      | Forward   | AAGGGAGAATCATGGACCAG                           |
|                                               | Reverse   | CCGTAAGGCATCATTGGACT                           |

SUPPLEMENTARY DATA

**Supplementary Table S2. Variants in genes causing syndromic forms of diabetes or neonatal diabetes**

| <b>Gene</b>    | <b>Protein</b>             | <b>Mutation</b>              | <b>Kindred</b>   |
|----------------|----------------------------|------------------------------|------------------|
| <i>WFS1</i>    | Wolfram Syndrome 1         | p.D85N<br>p.G604S<br>p.C355Y | F2<br>F17<br>F17 |
| <i>ALMS1</i>   | Alstrom Syndrome Protein 1 | p.V381I<br>p.I443V           | F11<br>F22       |
| <i>SLC19A2</i> | Thiamine transporter 1     | p.K355Q                      | F23              |

SUPPLEMENTARY DATA

**Supplementary Table S3. Additional variants identified in family F23.**

| <b>Gene</b>   | <b>AChange</b>                | <b>SIFT<br/>[cutoff&lt;0.05]<br/>(1)</b> | <b>PolyPhen2<br/>[scale 0 to 1]<br/>(2)</b> | <b>LRT<br/>[scale 0 to 1]<br/>(3)</b> | <b>MutationTaster<br/>[scale 0 to 1]<br/>(4)</b> | <b>GERP<br/>[cutoff≥ 3]<br/>(5)</b> | <b>Phenocopy subject<br/>[age at diagnosis]</b> | <b>Non-penetrant<br/>subject [age]</b> |
|---------------|-------------------------------|------------------------------------------|---------------------------------------------|---------------------------------------|--------------------------------------------------|-------------------------------------|-------------------------------------------------|----------------------------------------|
| <i>SMURF1</i> | NM_001199847:c.A1070G:p.K357R | 0.61                                     | 0.014                                       | 1                                     | 0.999                                            | 5.09                                | I-1 [35]                                        | I-2 [60], II-5 [40]                    |
| <i>SEMA4A</i> | NM_001193302:c.A4G:p.I2V      | 0                                        | 0.137                                       | 0.996                                 | 0.728                                            | 4.08                                | -                                               | II-5 [40]                              |
| <i>SARDH</i>  | NM_001134707:c.C731T:p.T244M  | 0.03                                     | 0.538                                       | 0.999                                 | 0.287                                            | 4.86                                | I-1 [35], II-1 [28]                             | I-2 [60], II-5 [40]                    |
| <i>HECW2</i>  | NM_020760:c.A1868G:p.E623G    | 0.23                                     | 0.913                                       | 0.959                                 | 0.144                                            | 5.05                                | I-1 [35]                                        | II-5 [40]                              |
| <i>AGMO</i>   | NM_001004320:c.G1297T:p.V433F | 0.04                                     | 0.068                                       | 0.759                                 | 0.440                                            | 1.43                                | I-1 [35]                                        | -                                      |

SUPPLEMENTARY DATA

**Supplementary Table S4. Software prediction algorithms used to assess the p.Lys355Gln mutation effect on THTR1 protein**

| <b>Software prediction algorithm</b> | <b>Score</b>                              | <b>Effect predicted</b> |
|--------------------------------------|-------------------------------------------|-------------------------|
| SIFT (1)                             | 0.059 (cutoff = 0.05)                     | Tolerated               |
| PROVEAN (6)                          | -2.69 (cutoff=-2.5)                       | Deleterious             |
| PolyPhen2 (2)                        | 0.95                                      | probably damaging       |
| MutationTaster (4)                   | 0.96 (scale 0 to 1)                       | disease causing         |
| LTR (3)                              | 1 (scale 0 to 1)                          | Deleterious             |
| Mupro (7)                            | Confidence score = -0.867 (scale -1 to 1) | Decrease Stability      |

SUPPLEMENTARY DATA

**Supplementary Table S5. Characteristics of islet donors**

| <b>Donor UNOS ID</b> | <b>Gender</b> | <b>Ethnicity/Race</b> | <b>Age (years)</b> | <b>BMI</b> | <b>Diabetic donor status</b> |
|----------------------|---------------|-----------------------|--------------------|------------|------------------------------|
| ABD1375              | Female        | White                 | 47                 | 25.0       | No                           |
| ZHD244               | Male          | Hispanic/Latino       | 49                 | 31.3       | No                           |
| ABJU206              | Female        | White                 | 52                 | 31.4       | No                           |
| XHW271               | Female        | White                 | 50                 | 26.4       | No                           |
| ABLM090              | Male          | Hispanic/Latino       | 58                 | 31.2       | No                           |
| ACAF132A             | Female        | White                 | 36                 | 42.7       | No                           |
| YJO424               | Male          | Caucasian             | 49                 | 28.2       | T2D                          |
| AAFS251              | Male          | Asian                 | 49                 | 23.9       | T2D                          |
| Xhk168a              | Female        | White                 | 38                 | 37.8       | T2D                          |
| YIC101               | Male          | White                 | 48                 | 35.8       | T2D                          |
| AAFS251              | Male          | Asian                 | 49                 | 23.9       | T2D                          |
| ABFE184              | Female        | White                 | 44                 | 32.8       | T2D                          |

## SUPPLEMENTARY DATA

### References

1. Ng PC, Henikoff S: SIFT: Predicting amino acid changes that affect protein function. *Nucleic Acids Res* 2003;31:3812-3814
2. Adzhubei IA, Schmidt S, Peshkin L, Ramensky VE, Gerasimova A, Bork P, Kondrashov AS, Sunyaev SR: A method and server for predicting damaging missense mutations. *Nat Methods* 2010;7:248-249
3. Chun S, Fay JC: Identification of deleterious mutations within three human genomes. *Genome Res* 2009;19:1553-1561
4. Schwarz JM, Rodelsperger C, Schuelke M, Seelow D: MutationTaster evaluates disease-causing potential of sequence alterations. *Nat Methods* 2010;7:575-576
5. Davydov EV, Goode DL, Sirota M, Cooper GM, Sidow A, Batzoglou S: Identifying a high fraction of the human genome to be under selective constraint using GERP++. *PLoS Comput Biol* 2010;6:e1001025
6. Choi Y, Chan AP: PROVEAN web server: a tool to predict the functional effect of amino acid substitutions and indels. *Bioinformatics* 2015;31:2745-2747
7. Cheng J, Randall A, Baldi P: Prediction of protein stability changes for single-site mutations using support vector machines. *Proteins* 2006;62:1125-1132

## SUPPLEMENTARY DATA

### Supplementary Figure S1. SLC19A2 expression levels.

The pcDNA3.1 plasmid construct carrying coding sequence of the human SLC19A2 gene (NM\_006996; OHu18269C, Genscript) was used as a template for generation of SLC19A2-K355Q mutant clone by means of site-directed mutagenesis. MIN6-m9 cells were transfected with either pcDNA3.1 empty vector, SLC19A2-WT, or SLC19A2-K355Q construct. Total RNA and protein were extracted from transfected cells at 48 hours after transfection.

- Relative SLC19A2 mRNA expression levels. Reverse transcription and qPCR were performed using the SuperScript® III Platinum® SYBR® Green One-Step qPCR Kit (Life Technologies) on an ABI 2900HT thermocycler with primers specific to human *SLC19A2* gene. Results were normalized to mouse Tata Box Binding Protein (TBP) expression levels.
- SLC19A2 protein levels. Concentrations of protein extracts from transfected MIN6-m9 cells were measured using a BCA protein assay kit (Pierce). Extracts were subjected to Western blotting with primary antibodies overnight at 4°C. Mouse and human anti-THTR-1 and anti-β-actin were from Sigma (#HPA016599) and Cell Signaling (#4970), respectively.
- Relative SLC19A2 protein levels. Band intensity of SLC19A2 and actin were quantitated by ImageJ-NIH (<https://imagej.nih.gov/ij/>).

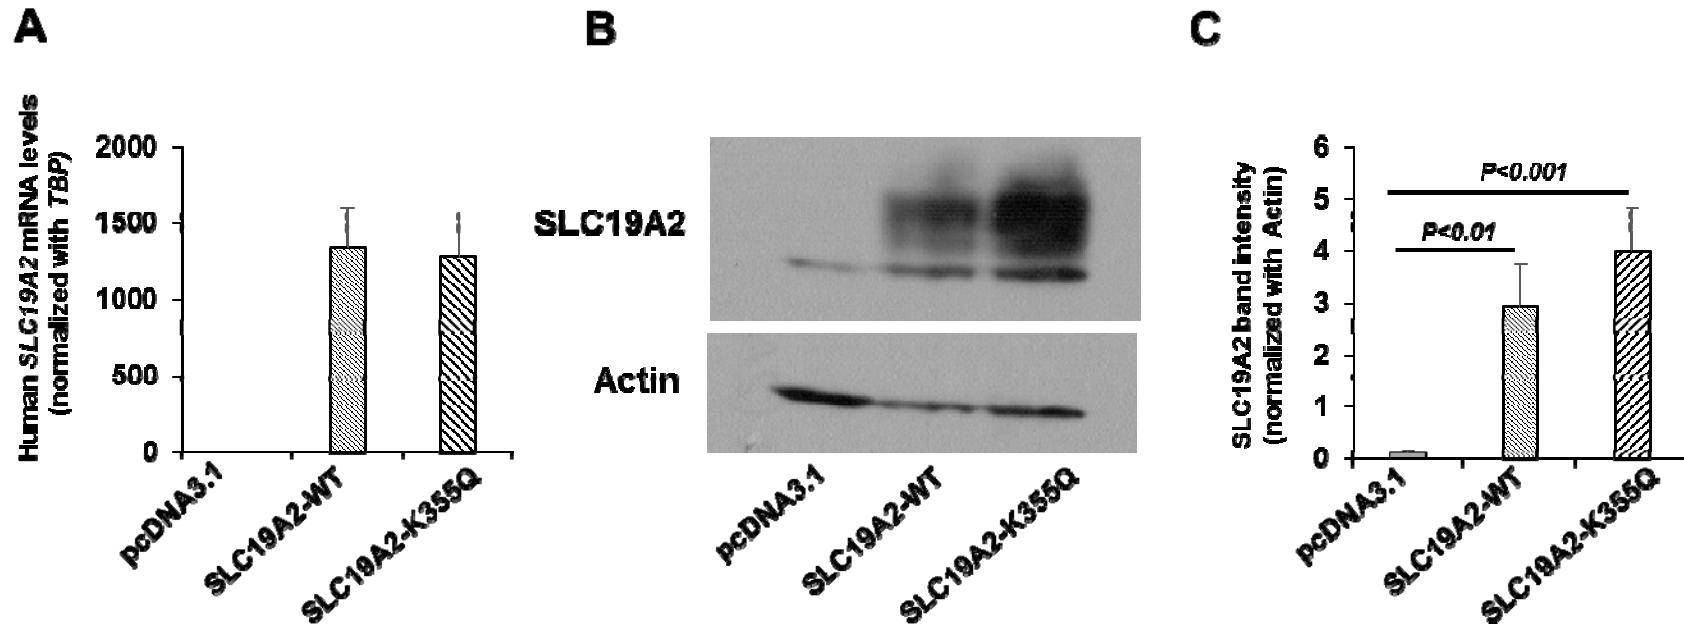

SUPPLEMENTARY DATA

**Supplementary Figure S2. Glycolytic activity of MIN6-m9 cells indicated by extracellular acidification rate (ECAR).**

Cells were suspended in DMEM containing 5.5 mM glucose and seeded onto Seahorse 24-well XF Cell Culture Microplates at the density of 50,000 cells/well. ECAR were measured by means of extracellular flux analysis with the Seahorse instrument (Seahorse Bioscience) at 18-24 hours after seeding. Data are presented as mean  $\pm$  SE of 3 independent experiments.

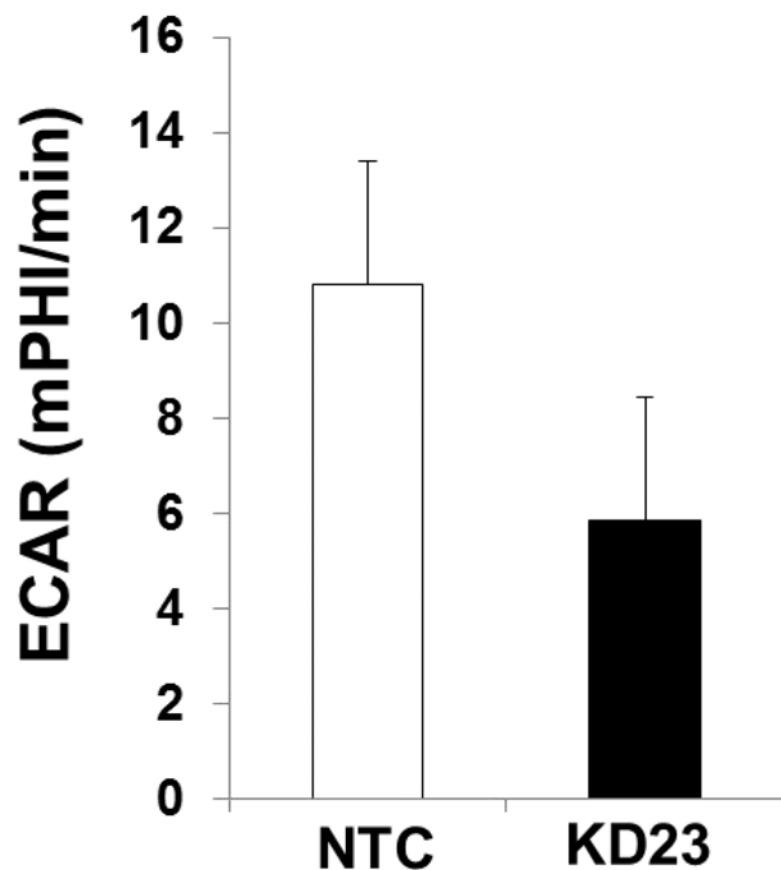



SUPPLEMENTARY DATA

**Supplementary Figure S3. Analysis of SLC19A2 mRNA levels in islets isolated from human subjects.**

Islets from non-diabetic (n=6) and T2D (n=6) human subjects were obtained from the Integrated Islet Distribution Program. All studies and protocols used were approved by the Joslin Diabetes Center's Committee on Human Studies (CHS#5-05). Upon receipt, islets were cultured overnight in Miami Media #1A (Cellgro). Total RNA was extracted using RNeasy Mini Kit (QIAGEN). One mg RNA was reverse-transcribed using a High-Capacity cDNA Reverse Transcription Kit (Applied Biosystems). Quantitative PCR was performed in an ABI 7900HT system, using SYBR Green Supermix (Bio-Rad). GAPDH or b-actin were used as an internal control.

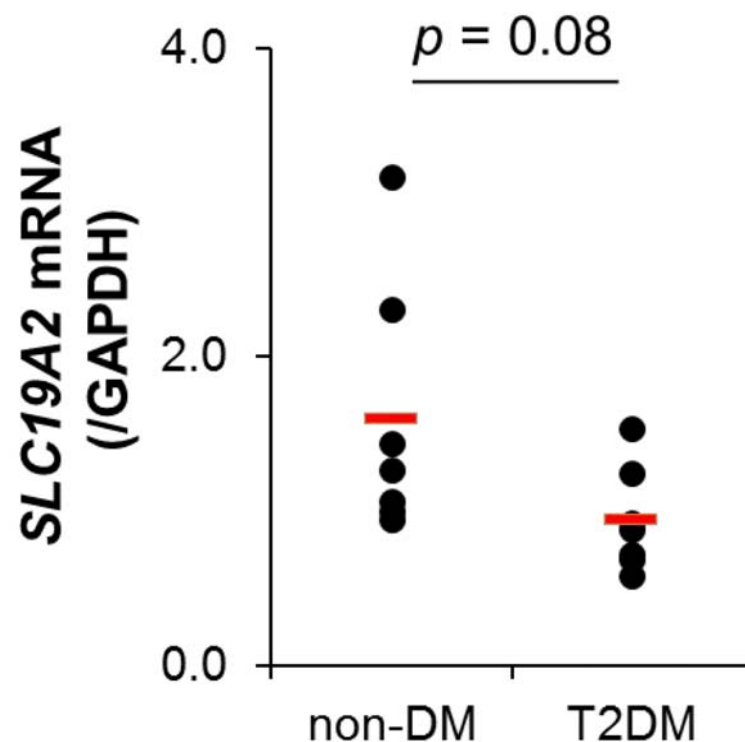

SUPPLEMENTARY DATA

**Supplementary Figure S4. Immunostaining of SLC19A2 and insulin of endocrine pancreas from mice model.**

Representatives immunostaining of mouse pancreas (n=3). Mouse pancreata were analyzed by immunostaining using anti-insulin (green), anti-SLC19A2 (red). Nuclei were stained with DAPI (blue). Pink boxes indicating areas shown at higher magnification in the right panel. Scale bar=20 $\mu$ m.

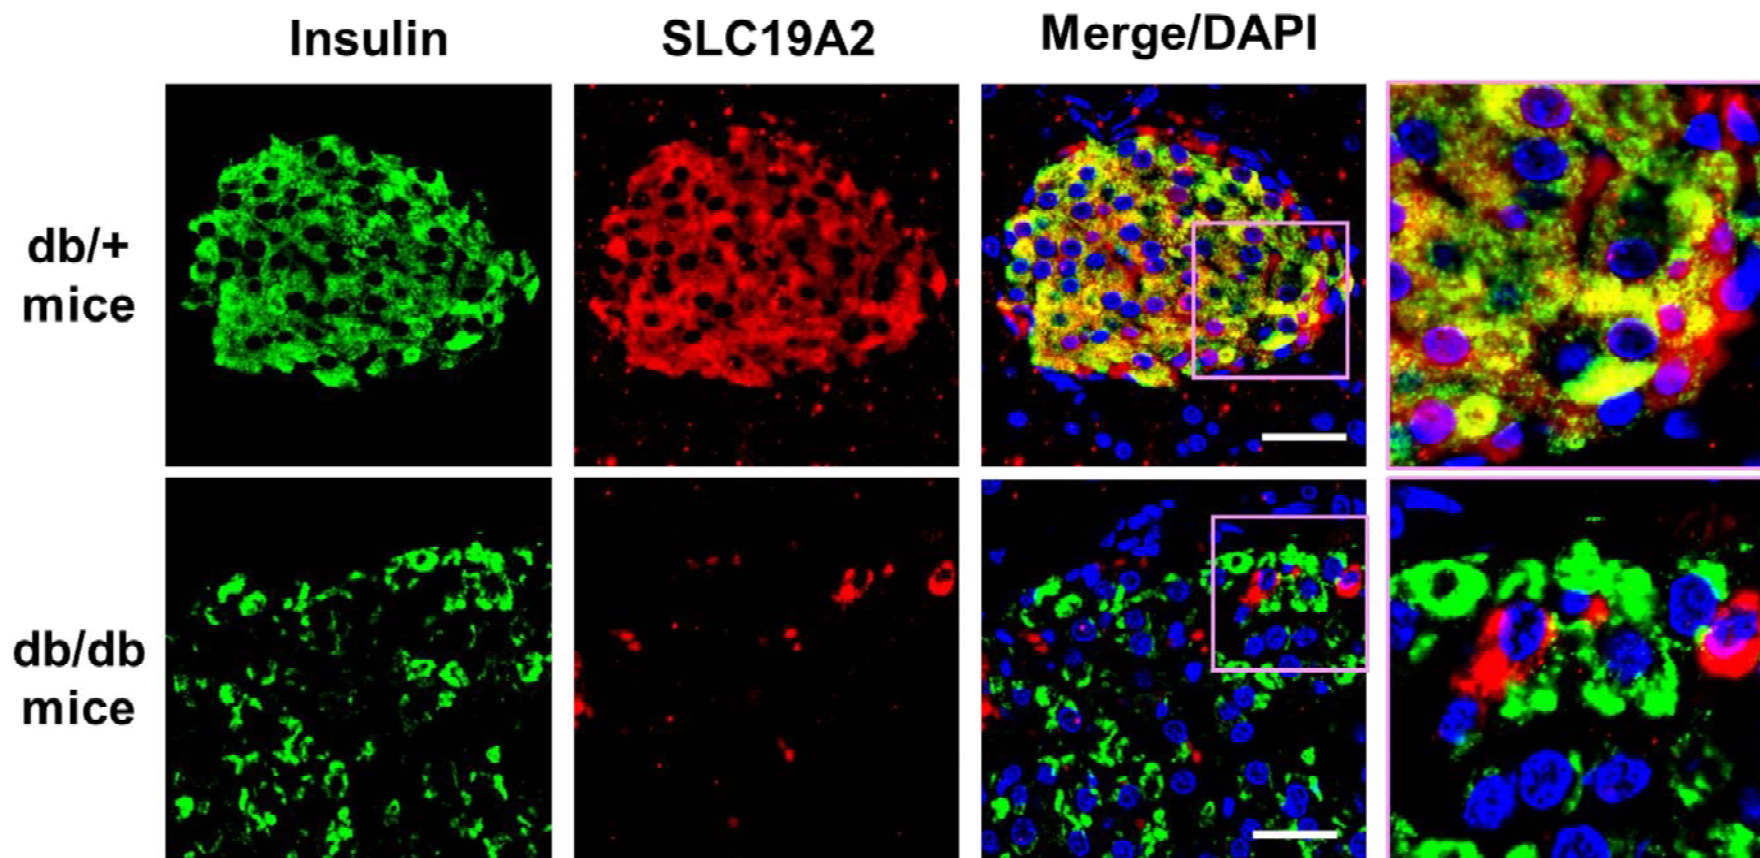

Supplement: DB170821SupplementaryData.pdf [file DB170821SupplementaryData.pdf]
